# Supplementary material for: Best practice guide for patellofemoral pain based on synthesis of a systematic review, the patient voice and expert clinical reasoning
Source: HighWire-hosted journal article supplement (doi:10.1136/bjsports-2024-108110), 2024-10-14
Supplement: bjsports-2024-108110supp002_data_supplement.pdf [file bjsports-2024-108110supp002_data_supplement.pdf]

### **Topic guide for clinician semi-structured interviews**

#### **Background of interviewee**

1. Tell me about your current role(s) and their relation to PFP:
  - a. How long have you been qualified?
  - b. What is your role within the management of PFP?
  - c. How often do you see cases of PFP?
  - d. What types of patients do you, or did you, see?
  - e. Tell me about your research involvement.

#### **Exploring the diagnosis of PFP**

2. How do you arrive at a diagnosis of PFP?
  - a. Clinical tests
  - b. Imaging
  - c. What are the common characteristics you might observe in someone with PFP?

#### **Patient education**

4. How do you explain a diagnosis of PFP to a patient?
5. Do you use any resources to help with patient education?
  - a. In what circumstance(s) would you use this information?

#### **Management of PFP**

6. How do you personally manage PFP?
  - a. What do you consider the best available treatment option(s)?
  - b. Do you use interventions without a strong evidence base?
  - c. (If so), tell me about your clinical reasoning behind these strategies.
  - d. What factors do you consider to be important in whether treatment will be successful or not?
    - i. Compliance/adherence
    - ii. Therapeutic alliance
    - iii. Prognostic factors/mechanisms
  - f. How has your management of PFP changed over time (if at all)?

#### **Perceptions of evidence**

8. What are your thoughts on the current evidence base for PFP?
9. How has your work contributed to current knowledge of PFP?
10. What facilitators exist for the translation of research into clinical practice?
11. What barriers exist that prevent the translation of research (if any)?
12. Where do you feel the current gaps or grey areas in knowledge are?
13. What do you believe should be a future research priority?
