# Supplementary material for: Best practice guide for patellofemoral pain based on synthesis of a systematic review, the patient voice and expert clinical reasoning
Source: HighWire-hosted journal article supplement (doi:10.1136/bjsports-2024-108110), 2024-10-14
Supplement: bjsports-2024-108110supp003_data_supplement.pdf [file bjsports-2024-108110supp003_data_supplement.pdf]

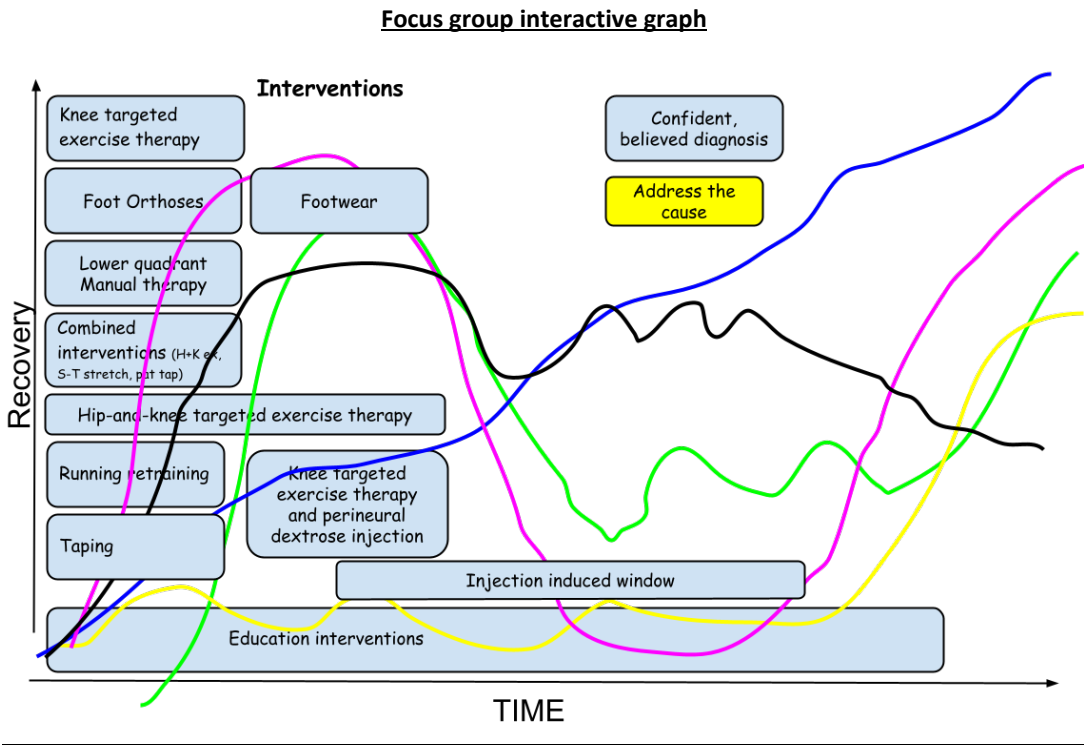

Focus group participants were shown the following interactive image depicting recovery on the Y axis and time on the x axis, with a series of patient journeys (i.e., recovery over time) reflected by the coloured lines. Specific interventions were reflected by blue boxes and could be modified/moved by the participants to differing positions on the graph to elucidate their clinical reasoning.
